# Supplementary material
Source: PubMed Central journal article supplement (PMC4815102)
Supplement: supp_tpc.15.00329_TPC2015-00329-RAR2_Supplemental_Data.pdf [file supp_tpc.15.00329_TPC2015-00329-RAR2_Supplemental_Data.pdf]

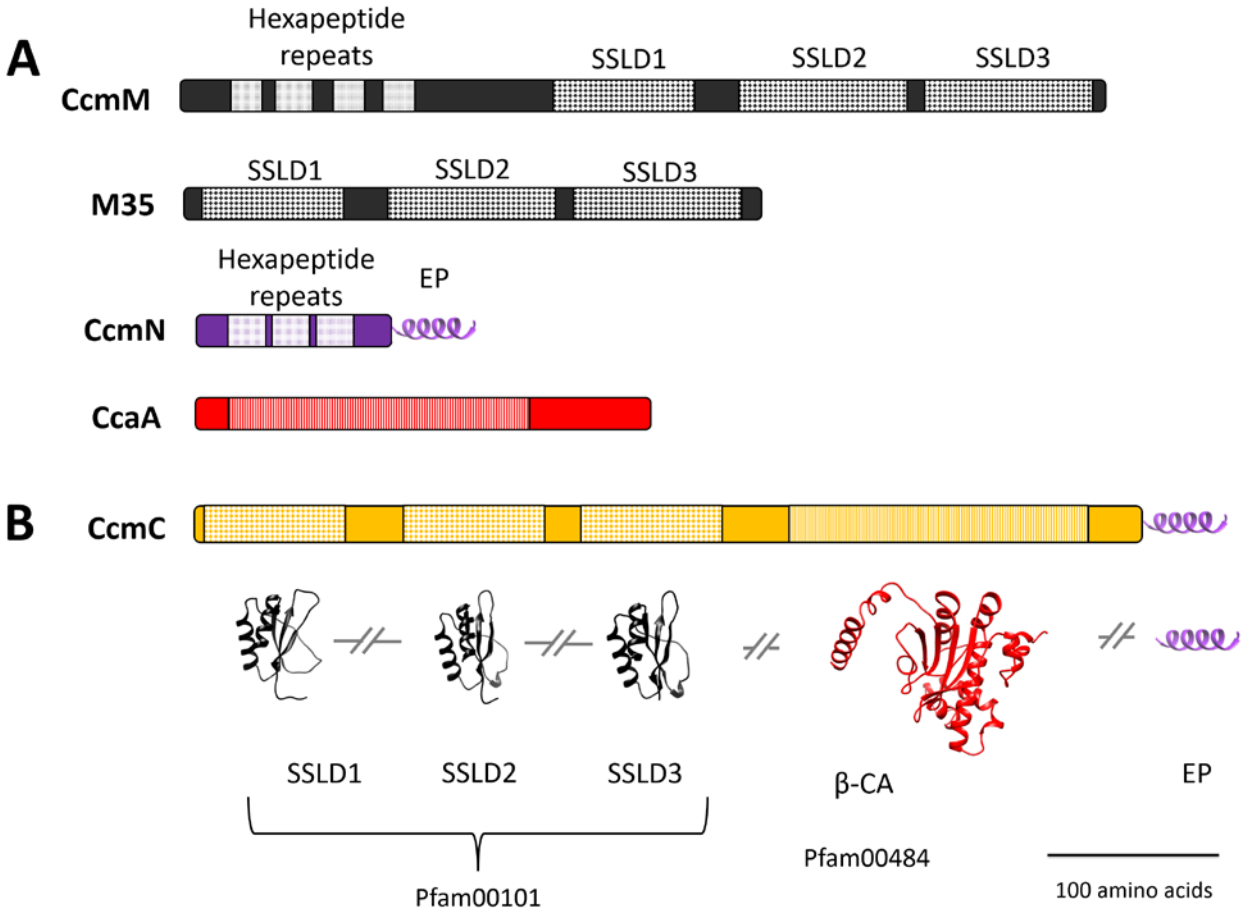

**Supplemental Figure 1. Schematic of domain architectures in CcmM, CcmN, CcaA and CcmC.** (A) Domain architectures of the four proteins that recruit RuBisCO and assemble the carboxysome core. (B) The architecture and (predicted) structure of the domains of the chimeric protein, CcmC. SSLD: Small subunit-like domain. EP: Encapsulation peptide. CA: Carbonic anhydrase.

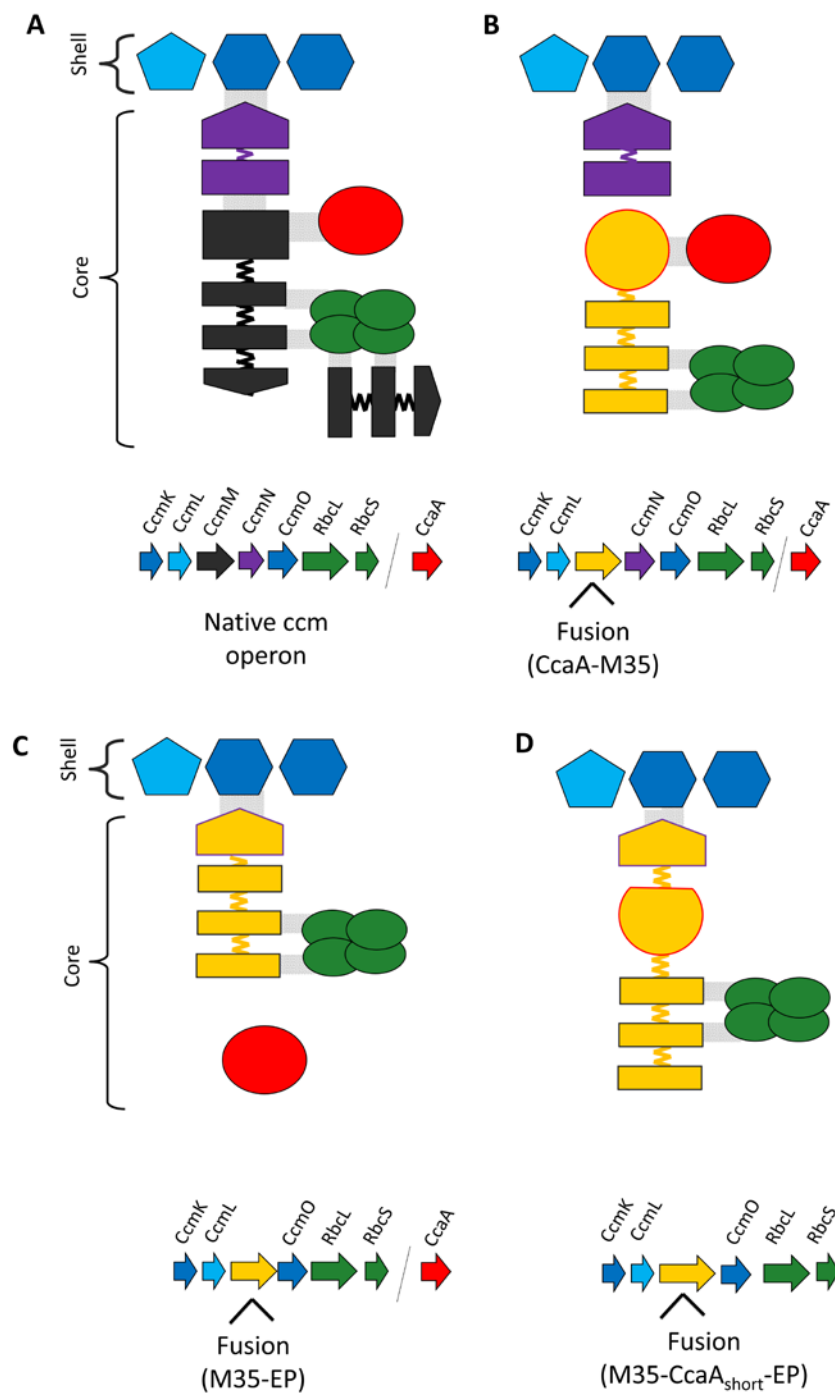

**Supplemental Figure 2. Schematics of native and designed chimeric carboxysome cores used in this study.** (A): Native  $\beta$ -carboxysome core and (B): CcaA-M35 (a fusion of CcaA and 3xSSLDs). (C): M35-EP (a fusion of the EP of CcmN and 3xSSLDs). (D): CcmC (a fusion of the EP of CcmN, a shortened version of CcaA and 3xSSLDs). Colors correspond to the gene depicted on the bottom. Gray shading denotes known non-covalent domain interactions. SSLD: small subunit-like domain. EP: Encapsulation peptide.

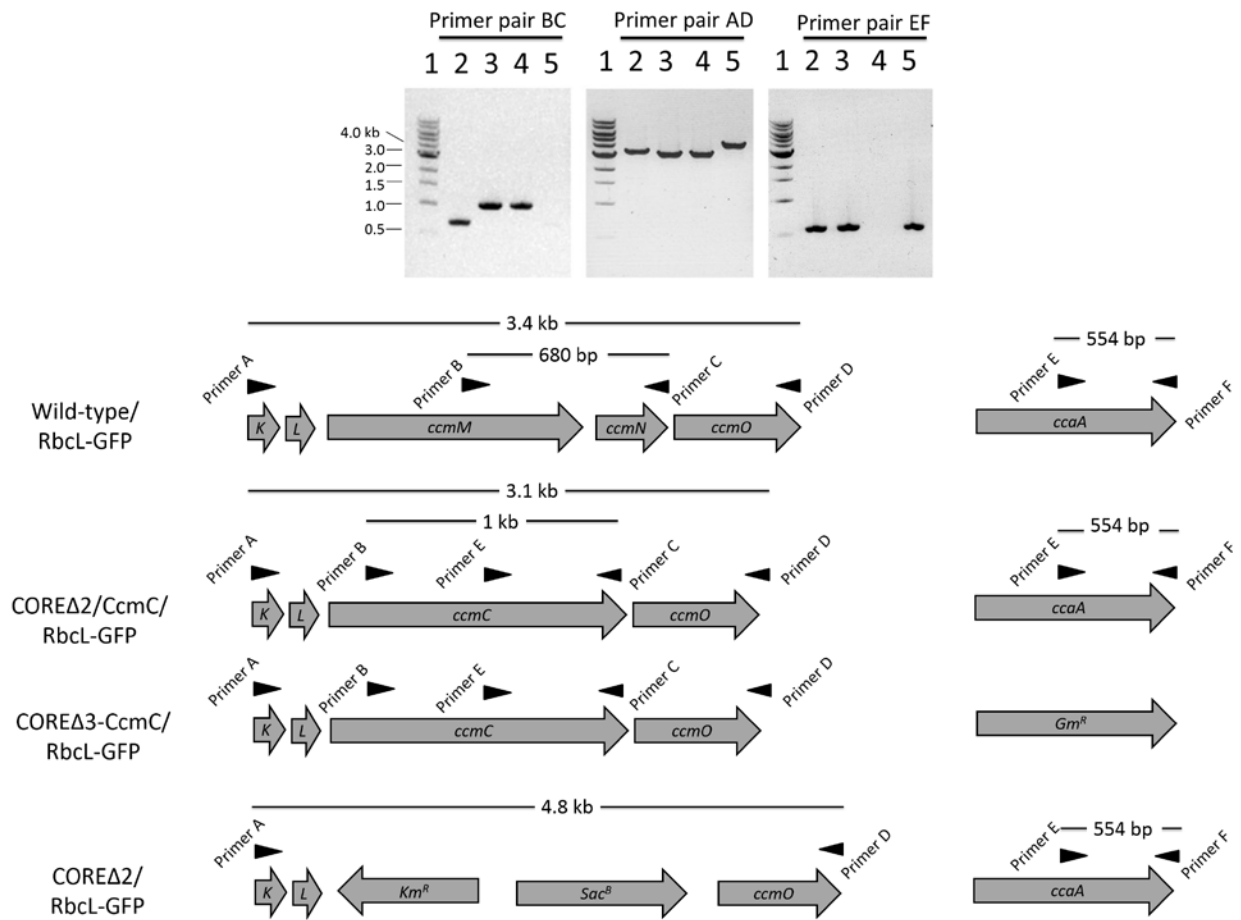

**Supplemental Figure 3. Confirmation of genomic integration.** Top: DNA fragments amplified by PCR were run on 1.2% agarose gels. Bottom: Primer location and expected DNA fragment size based on the DNA template. 1: 1 kb DNA band; 2: Wild-type/RbcL-GFP; 3: COREΔ2/CcmC/RbcL-GFP; 4: COREΔ3/CcmC/RbcL-GFP; 5: COREΔ2/RbcL-GFP.

AGCCGCGGCAGTCAAGCGCGCCATGTGCGCGATTGTCAGGAACGACCGGTTGATGCAGCTGTCATTGCCA  
TCATCGATACGGTCAACGTGGAAAACCGCTCCGCTCTACGACAAACGCGAGCACAGCTAATGGGCAGGGAT  
TGAATCCCTGCTGGTCATTGATCTGGATTGAGCCCAGGCTTGGGAGGTTAGCATATGACCGTGAGCGCTT  
ATAACGGCCAAGGCCGACTCAGTTCCGAAGTCATCACCCAAGTCCGGAGTTTGCTGAACCAGGGCTATCG  
GATTGGGACGGAACATGCGGACAAGCGCCGCTTCCGGACTAGCTCTTGGCAGCCCTGCGCGCCGATTCAA  
AGCACGAACGAGCGCCAGGTCTTGAGCGAACTGGAAAATTGTCTGAGCGAACACGAAGGTGAATACGTTT  
GCTTGCTCGGCATCGATACCAATACTCGCAGCCGTGTTTTTGAAGCCCTGATTCAACGGCCCCGATGGTTC  
GGTTCCCTGAATCGCTGGGGAGCCAACCGGTGGCAGTCGCTTCCGGTGGTGGCCGTCAGAGCAGCTATGCC  
AGCGTCAGCGGCAACCTCTCAGCAGAAGTGGTCAATAAAGTCCGCAACCTCTTAGCCCAAGGCTATCGGA  
TTGGGACGGAACATGCAGACAAGCGCCGCTTTCGGACTAGCTCTTGGCAGTCTTGGCACCAGGATTCAAAG  
TTCGAATGAGCGCCAGGTTCTGGCTGAACTGGAAAACCTGTCTGAGCGAGCACGAAGGTGAGTACGTTTCGC  
CTGCTGGGCATCGACACTGCTAGCCGAGTCGTGTTTTTGAAGCCCTGATCCAAGATCCCCAAGGACCGG  
TGGGTTCCGCCAAAAGCGGCCGCCGACCTGTGAGTTCGGCAACGCCAGCAGCCACAGCTACACCTCAA  
TGGATCGAGTTCGAGCGATGTCGCTGGACAGGTTCCGGGGTCTGCTAGCCCAAGGCTACCGGATCAGTGCG  
GAAGTCGCCGATAAGCGTCGCTTCAAACCAGCTCTTGGCAGAGTTTGCCGGCTCTGAGTGGCCAGAGCG  
AAGCAACTGTCTTGCTGCTTTGGAGTCAATTCTGCAAGAGCACAAAGGTAAGTATGTGCGCCTGATTGG  
GATTGACCCTGCGGCTCGTCGTGCGTGGCTGAACTGTTGATTCAAAGCCGGGATCTCGCAAGCTCATC  
GAGGGGTTACGGCATTTCCTGACGTCCTACTACCCGTCTCATCGGGACCTGTTTCGAGCAGTTTGCCAAAG  
GTCAGCACCCCTCGAGTCTGTTTATTACCTGCTCAGACTCGCGCATTGACCCTAACCTCATTACCCAGTC  
GGCATGGGTGAGCTGTTTCGTTCATTCGCAACGCTGGCAATCTGATCCCGCCCTTCGGTGGCCCAACGGT  
GGTGAAGGGGCATCGATCGAATACGCGATCGCAGCTTTGAACATTGAGCATGTTGTGGTCTGCGGTCCT  
CGCACTGCGGTGCGATGAAAGGGCTGCTCAAGCTCAATCAGCTGCAAGAGGACATGCCGCTGGTCTATGA  
CTGGCTGCAGCATGCCAAGCCACCCGCCGCTAGTCTTGGATAACTACAGCGGTTATGAGACTGACGAC  
TTGGTAGAGATTCTGGTCGCCGAGAAATGTGCTGACGCAGATCGAGAACCTTAAGACCTACCCGATCGTGC  
GATCGCGCCTTTTCCAAGGCAAGCTGCAGATTTTGGCTGGATTTATGAAGTTGAAAGCGGCGAGGCTTT  
GCAGATTAGCCGTACCAGCAGTGATGACACAGGCATTGATGAATGTCCAGTGCGTTCGCCCCGCGAGCCAG  
GAGAAAGCCATTCTCGGTCGTTGTGTCGTCCCCCTGACCGAAGAAGTGGCCGTTGCTCCACCAGAGCCGG  
AGCCTGTGATCGCGGCTGTGGCGGCTCCACCCGCAACTACTCCAGTCGCGGTTGGTTGGGATCTGGAGG  
CAGTGTCTACGGCAAGGAACAGTTTTTTCGGGATGCGCCAGAGCATGTTCCCCGATCGCTAAGATGTGCAC  
AGCAGCTCTAGGAGCTGCAGGGTACT

**Supplemental Figure 4. DNA sequence of *ccmC* integrated into the CCM locus.** Confirmation of the sequence of *ccmC* by Sanger sequencing. Blue: *ccmK2* gene; Black: Intergenic regions; Red: *ccmC* gene.

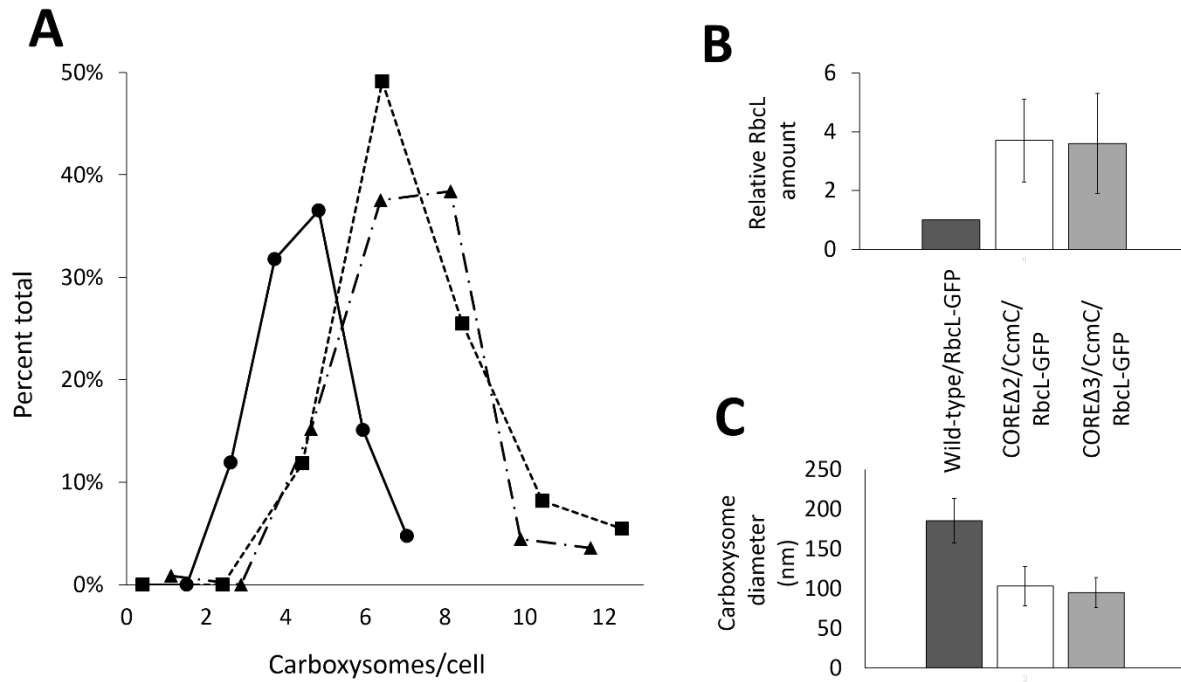

**Supplemental Figure 5. Structural characterization of native and minimized carboxysomes.** (A): Distribution of the number of carboxysomes per cell ( $n \leq 100$ ). (B) Relative RbcL content in protein samples normalized to Chl *a* ( $n=3$ ). (C): Carboxysome diameters measured from electron micrographs ( $n=50$ ). Solid line and dark grey bar: Wild-type/RbcL-GFP; Dash-dotted line: CORE $\Delta$ 2/CcmC/RbcL-GFP and Dashed line and light grey bar: CORE $\Delta$ 3/CcmC/RbcL-GFP. Error bars= std. dev.

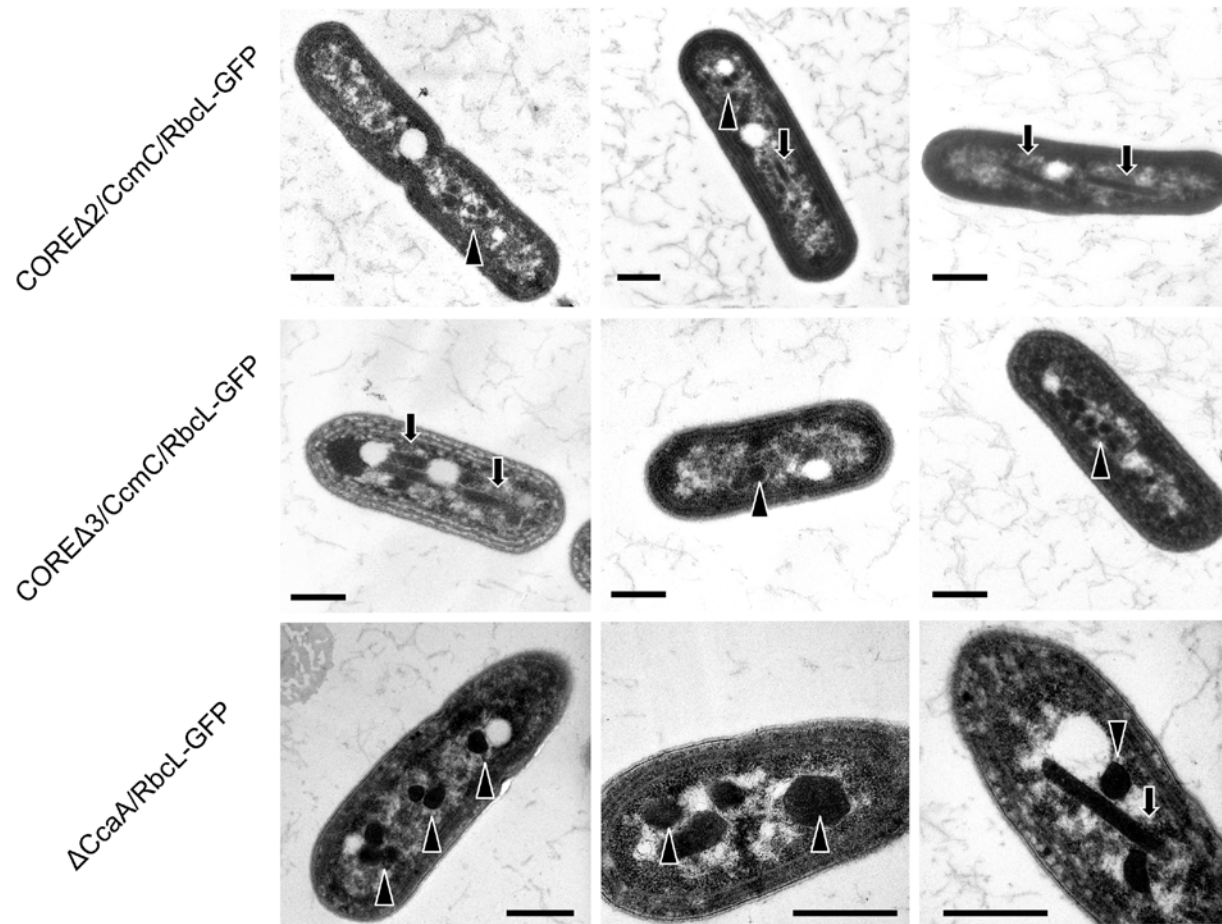

**Supplemental Figure 6. Additional transmission electron micrographs of carboxysomal core mutants.** Top panels: COREΔ2/CcmC/RbcL-GFP; Middle panels: COREΔ3/CcmC/RbcL-GFP; Bottom panels: ΔCcaA/RbcL-GFP. Cells incubated for at least 12 hours in air. Arrowhead: carboxysomes; Arrow: rod carboxysomes. Scale bar: 500 nm.

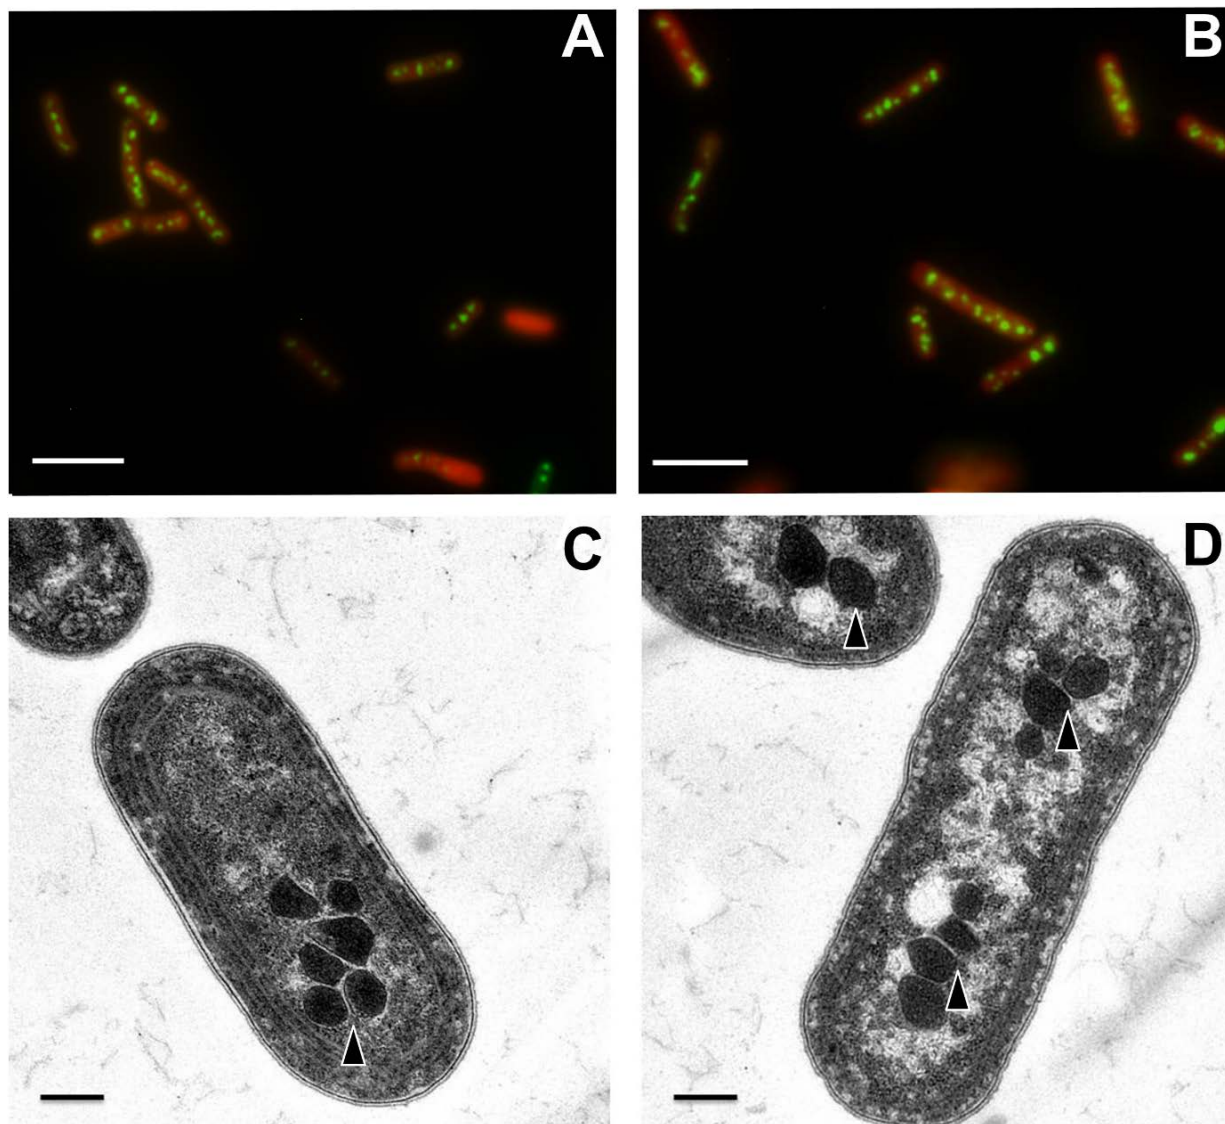

**Supplemental Figure 7. Carboxysome aggregation in the  $\Delta CcaA/RbcL$ -GFP mutant.** Fluorescence (A and B) and transmission electron (C and D) micrographs of the hcr strain  $\Delta CcaA/RbcL$ -GFP. Scale bars: 5  $\mu m$  for A-B; 200 nm for C-D. Arrowhead: carboxysomes.

### CcaA-M35

MRKLI~~EGLRHFRTSYYP~~SHRDLFEQFAKGQHPRVLFITCSDSRIDPNLITQSGMGELFVIRNAGNLI~~PPFGAANGGEGASIEY~~AI~~AALNIEHV~~VVCGHSHCGAMKGLLKLNLQEDMPLVYD~~WLQHAQATRRLVLDN~~YSGYETDDLVEILVAENVLTQIENLKTYPIVRSRLFQGLQIFGWIYEVESEGEVLQISRTSSDDTGIDECVRLPGSQEKAILGRCVVPLTEEVAVAPPEPEPVIAAVAAPPANYS~~SRGWL~~AP~~EQQR~~IY~~RGNAS~~GSVSAYNGQGRLSSEVITQVRSLLNQGRRIGTEHADKRRFRTSSWQPCAPIQSTNERQVLSELENCLSEHEGEYVRLLGIDTNTRSRVFEALIQRPDGSVPESLGSQPVAVASGGGRQSSYASVSGNLSAEVVKVRNLLAQGYRIGTEHADKRRFRTSSWQSCAPIQSSNERQVLAELENCLSEHEGEYVRLLGIDTASRSRVFEALIQDPQGPVGSAKAAAAAPVSSATPSSSHSYTSNGSSSDVAGQVRGLLAQGYRISAEVADKRRFQTSSWQSLPALSGQSEATVLPALLESILQEHKGYVRLIGIDPAARRRVAELLIQKP

### M35-EP

MTVSAYNGQGRLSSEVITQVRSLLNQGRRIGTEHADKRRFRTSSWQPCAPIQSTNERQVLSELENCLSEHEGEYVRLLGIDTNTRSRVFEALIQRPDGSVPESLGSQPVAVASGGGRQSSYASVSGNLSAEVVKVRNLLAQGYRIGTEHADKRRFRTSSWQSCAPIQSSNERQVLAELENCLSEHEGEYVRLLGIDTASRSRVFEALIQDPQGPVGSAKAAAAAPVSSATPSSSHSYTSNGSSSDVAGQVRGLLAQGYRISAEVADKRRFQTSSWQSLPALSGQSEATVLPALLESILQEHKGYVRLIGIDPAARRRVAELLIQKPGSGGSVYGKEQFLMRQSMFPDR

### CcmC

MTVSAYNGQGRLSSEVITQVRSLLNQGRRIGTEHADKRRFRTSSWQPCAPIQSTNERQVLSELENCLSEHEGEYVRLLGIDTNTRSRVFEALIQRPDGSVPESLGSQPVAVASGGGRQSSYASVSGNLSAEVVKVRNLLAQGYRIGTEHADKRRFRTSSWQSCAPIQSSNERQVLAELENCLSEHEGEYVRLLGIDTASRSRVFEALIQDPQGPVGSAKAAAAAPVSSATPSSSHSYTSNGSSSDVAGQVRGLLAQGYRISAEVADKRRFQTSSWQSLPALSGQSEATVLPALLESILQEHKGYVRLIGIDPAARRRVAELLIQKPGSRKLI~~EGLRHFRTSYYP~~SHRDLFEQFAKGQHPRVLFITCSDSRIDPNLITQSGMGELFVIRNAGNLI~~PPFGAANGGEGASIEY~~AI~~AALNIEHV~~VVCGHSHCGAMKGLLKLNLQEDMPLVYD~~WLQHAQATRRLVLDN~~YSGYETDDLVEILVAENVLTQIENLKTYPIVRSRLFQGLQIFGWIYEVESEGEVLQISRTSSDDTGIDECVRLPGSQEKAILGRCVVPLTEEVAVAPPEPEPVIAAVAAPPANYS~~SRGWL~~GS~~GGSVYGKEQFLMRQSMFPDR~~

**Supplemental Figure 8. Amino acid sequences of the chimeric proteins.** CcaA-M35 and M35-EP correspond to proteins that failed to rescue the high CO<sub>2</sub>-requiring phenotype. CcmC forms a functional streamlined carboxysomes core. Color of the letters correspond to: black: SSLDs, grey: linkers, red: carbonic anhydrase, purple: encapsulation peptide.



**Supplemental Table 1. Primers used in this study**

| Primer ID                         | Purpose                       | Sequence                           |
|-----------------------------------|-------------------------------|------------------------------------|
| pUC19 spel fwd                    | CcmM-N deletion               | GGTGCACTACTAGTACAATCTGC            |
| pUC19 spel rv                     | CcmM-N deletion               | GTGAAATACCGCACTAGTGCGTAAG          |
| FR left (ccmL-O) fwd              | CcmM-N deletion               | CTTTCATCTTGAATTCCGACTCTTTAGG       |
| FR left (ccmL-O) rv               | CcmM-N deletion               | GCTCGGCATATGCTAACCTC               |
| FR right (ccmL-O) fwd             | CcmM-N deletion               | GGGAGGTTAGCATATGCTCTAGAAGCTGCAGG   |
| FR right (ccmL-O) rv              | CcmM-N deletion               | CTACTGAGTCCGAAGCTTTCAGC            |
| Km <sup>R</sup> /SacB fwd         | CcmM-N deletion               | GAATTATAACCATATGCATCCTAGG          |
| Km <sup>R</sup> /SacB rv          | CcmM-N deletion               | TCCCGTCTAGACAGCGTAATG              |
| CcaA ndel fwd                     | <i>ccmC</i> , <i>ccaA-M35</i> | GAGTATCACTCATATGCGCAAGC            |
| CcaA bamHI rv                     | <i>ccaA-M35</i>               | CTTCGGGATCCGCTAGCATTG              |
| SSLDs-CcmN bglII fwd-             | <i>ccaA-M35</i>               | TAGCGAGGCAAGATCTGTGAGC             |
| SSLDs-CcmN xhoI rv-               | <i>ccaA-M35</i>               | CCTGCAGCTTCTAGAGCTGCTGTG           |
| CcaA <sub>(short)</sub> bamHI rv  | <i>ccmC</i>                   | GTTGTTGTTCCGGATCCCAACCAAC          |
| EP bglII fwd                      | <i>ccmC</i> , <i>M35-EP</i>   | CCCAGATCTGGAGGCAGTGTCTACGGCAAGGAAC |
| EP NcoI rv                        | <i>ccmC</i> , <i>M35-EP</i>   | CGTGCCATGGCTTCTTGGGAGAGC           |
| ccaA <sub>(short)</sub> bglII fwd | <i>ccmC</i>                   | GCCCTTGTGAGATCTCGCAAGCTCATCG       |
| SSLDs ndel fwd                    | <i>ccmC</i> , <i>M35-EP</i>   | CTAGCGAGCATATGACCGTGAGCGC          |
| SSLDs bamHI rv                    | <i>ccmC</i> , <i>M35-EP</i>   | CAGGATCCTCCCGGCTTTTGTAGAGC         |
| FR left (ccaA) notI fwd           | CcaA deletion                 | CAGCGGCCGCGCCTAGTGC                |
| FR left (ccaA) xhoI rv            | CcaA deletion                 | GCTTGCGCATCTCGAGTGATACTCGGGAC      |
| FR right (ccaA) xbaI fwd          | CcaA deletion                 | GCGGCAATTCTAGATAGGATCGAAGCATC      |
| FR right (ccaA) ncoI rv           | CcaA deletion                 | TACCCATGGACTCAAGCGCTCATTGCCAG      |
| Gm <sup>R</sup> xhoI fwd          | CcaA deletion                 | GGTACCGAGCTCGAGTTGACATAAGC         |
| Gm <sup>R</sup> xbaI rv           | CcaA deletion                 | TCCGCGGCTCTAGAGCCGATC              |
| Primer A                          | Screening                     | TGCCTATTGCGGTTGGAATG               |
| Primer B                          | Screening                     | AATCATGATGCACGCCCTTG               |
| Primer C                          | Screening                     | AATCATGATGCACGCCCTTG               |
| Primer D                          | Screening                     | TTAGCCGATTTGAGCATGGC               |
| Primer E                          | Screening                     | CAGCTTTGAACATTGAGCATGTTGTG         |
| Primer F                          | Screening                     | ATTGCCGCGATAAATCCGCTG              |
